# Supplementary material
Source: Springer Nature journal article supplement (https://www.springermedizin.de/resource/supplementary/12911_2012_469_MOESM1_ESM.pdf/9525944)
Supplement: MOESM1 [file 9525944]

**Governance via international project team and local advisory groups (local research teams, people with MS, MS society staff)**

**Stage 1: Qualitative research**

**Focus groups**

- Recruitment MS societies and MS clinics

**Participants:**

- People with MS and family members

**Stage 2: Action research**

**Construct evidence summary template**

- Evidence from Cochrane MS reviews

**Review panels (workshops)**

- Template and summary formats discussed
- Supportive materials identified

**Participants:**

- People with MS and family members
- MS society staff
- Health professionals

**Analysis and template revision**

**Stage 3: Operational research**

- Evidence summaries published on internet
- Guidelines prepared for the creation of evidence summaries
- Topics based on Cochrane MS reviews

**Stage 4: Evaluation**

- Online survey developed
- Evaluation of usability, need, health literacy and quality assessments

**Participants:**

- People with MS and family members

- Dissemination of project results in peer reviewed literature, conferences and to MS societies
